# Supplementary material
Source: MDPI journal article supplement (https://www.mdpi.com/2071-1050/9/11/2093)
Supplement: s1 [file s1]

**Table S1.** Mean volume of overstory tree species in the managed and unmanaged stands.

| Species                                  | Beginning of the study |        |                  |        | Term-end of the study |        |                  |        |
|------------------------------------------|------------------------|--------|------------------|--------|-----------------------|--------|------------------|--------|
|                                          | Managed (n=25)         |        | Unmanaged (n=33) |        | Unmanaged (n=25)      |        | Unmanaged (n=33) |        |
|                                          | Average                | (SD)   | Average          | (SD)   | Average               | (SD)   | Average          | (SD)   |
| Volume of trees (m <sup>3</sup> /0.16ha) |                        |        |                  |        |                       |        |                  |        |
| <i>Abies sachalinensis</i>               | 21.5                   | (13.4) | 21.8             | (10.4) | 26.6                  | (16.5) | 28.6             | (11.9) |
| <i>Quercus crispula</i>                  | 5.0                    | (4.5)  | 5.2              | (5.1)  | 5.8                   | (3.4)  | 6.0              | (5.5)  |
| <i>Tilia japonica</i>                    | 2.9                    | (2.3)  | 7.5              | (5.7)  | 3.3                   | (2.3)  | 7.0              | (5.0)  |
| <i>Acer pictum</i>                       | 3.9                    | (3.4)  | 3.0              | (2.1)  | 3.6                   | (3.4)  | 3.0              | (2.0)  |
| <i>Betula ermanii</i>                    | 4.7                    | (4.7)  | 1.2              | (2.2)  | 4.2                   | (3.3)  | 1.3              | (2.1)  |
| <i>Kalopanax septemlobus</i>             | 0.6                    | (1.4)  | 0.6              | (1.8)  | 1.1                   | (1.7)  | 0.9              | (2.0)  |
| <i>Alnus hirsuta</i>                     | 1.0                    | (1.3)  | 0.3              | (0.6)  | 1.0                   | (1.5)  | 0.4              | (0.8)  |

Only those species that showed a volume of 1.0 m<sup>3</sup> /0.16 h or greater in either stand were shown

**Table S2.** Mean coverage of dominant understory vascular plant species in the managed and unmanaged stands.

| Species                               | Group        | Managed (n=10) |        | Unmanaged (n=10) |        |
|---------------------------------------|--------------|----------------|--------|------------------|--------|
|                                       |              | Average        | (SD)   | Average          | (SD)   |
| Coverage                              |              |                |        |                  |        |
| <i>Sasa senanensis</i>                | dwarf bamboo | 61.2           | (29.9) | 72.4             | (11.0) |
| <i>Sasa kurilensis</i>                | dwarf bamboo | 16.6           | (22.3) | 10.0             | (15.9) |
| <i>Schizophragma hydrangeoides</i>    | wine         | 3.0            | (4.1)  | 2.3              | (3.6)  |
| <i>Viburnum furcatum</i>              | shrub        | 2.9            | (4.2)  | 1.4              | (2.2)  |
| <i>Toxicodendron orientale</i>        | wine         | 2.9            | (4.6)  | 1.1              | (0.9)  |
| <i>Hydrangea paniculata</i>           | shrub        | 0.2            | (0.5)  | 1.8              | (5.6)  |
| <i>Vitis coignetia</i>                | wine         | 0.7            | (1.7)  | 1.4              | (4.1)  |
| <i>Skimmia japonica</i> var. intermed | shrub        | 1.3            | (3.1)  | 0.7              | (0.9)  |
| <i>Dryopteris crassirhizoma</i>       | fern         | 1.3            | (2.9)  | 0.0              | 0.0    |
| <i>Cirsium kamtschaticum</i>          | forb         | 0.0            | (0.1)  | 1.3              | (3.0)  |
| <i>Abies sachalinensis</i>            | tall tree    | 1.1            | (2.4)  | 0.1              | (0.4)  |
| <i>Cimicifuga simplex</i>             | herb         | 1.0            | (1.7)  | 0.4              | (0.5)  |

Only those species that showed a mean coverage of 1% or more in either stand were shown

**Table S3.** Occurrence frequency of avian species in the managed and unmanaged stands.

| Species                         | Group         | Managed | Unmanaged |
|---------------------------------|---------------|---------|-----------|
| Occurrence frequency            |               |         |           |
| <i>Phylloscopus coronatus</i>   | trunk         | 46.0    | 70.0      |
| <i>Horornis diphone</i>         | understory    | 50.0    | 56.0      |
| <i>Parus minor</i>              | cavity/ trunk | 16.0    | 48.0      |
| <i>Sitta europaea</i>           | cavity/ trunk | 32.0    | 42.0      |
| <i>Luscinia cyane</i>           | understory    | 30.0    | 46.0      |
| <i>Urosphena squameiceps</i>    | understory    | 24.0    | 38.0      |
| <i>Phylloscopus borealoides</i> | trunk         | 8.0     | 36.0      |
| <i>Emberiza spodocephala</i>    | understory    | 20.0    | 34.0      |
| <i>Erithacus akahige</i>        | understory    | 30.0    | 4.0       |
| <i>Emberiza variabilis</i>      | understory    | 18.0    | 8.0       |
| <i>Dendrocopos major</i>        | cavity/ trunk | 16.0    | 8.0       |
| <i>Periparus ater</i>           | cavity/ trunk | 4.0     | 16.0      |
| <i>Dryocopus martius</i>        | cavity/ trunk | 2.0     | 14.0      |
